# Supplementary material for: Engineering xylose metabolism in thraustochytrid T18
Source: PubMed Central journal article supplement (PMC6139898; doi:10.1186/s13068-018-1246-1), 2018-09-17
Supplement: 13068_2018_1246_MOESM1_ESM.pdf [file 13068_2018_1246_MOESM1_ESM.pdf]

## Additional file 1

**Additional file 1: Table S1: Plasmids used in this study**

| Plasmids               | Relevant characteristics                                                                                      | References |
|------------------------|---------------------------------------------------------------------------------------------------------------|------------|
| pCR2.1-Topo            | AmpR. <i>E. coli</i> cloning vector                                                                           | Invitrogen |
| pTopoXyloIso           | AmpR. T18 xylose isomerase in pCR2.1-Topo                                                                     | This study |
| pET23-MTF              | AmpR. pET23 derivative containing N-terminal histidine tag and T7 promoter                                    | [1]        |
| pET23-isohis           | AmpR. His-tagged T18 xylose isomerase in pET23-MTF                                                            | This study |
| pYES2                  | AmpR. Yeast expression plasmid with GAL1 promoter and <i>URA3</i> .                                           | Invitrogen |
| pYES2-isohis           | AmpR. Inducible His-tagged T18 xylose isomerase for protein expression in yeast                               | This study |
| pTopoXylA              | AmpR. W3110 <i>xylA</i> in pCR2.1-Topo                                                                        | This study |
| pET23-XylAhis          | AmpR. His-tagged <i>E. coli</i> W3110 <i>xylA</i> for expression in <i>E. coli</i> under a T7 promoter        | This study |
| pJB5                   | KanR. pUC5, $\alpha$ -tubulin promoter, <i>ble-2A</i> , $\alpha$ -tubulin terminator                          | This study |
| p $\alpha$ -tub isohis | KanR. His-tagged T18 xylose isomerase cloned downstream of <i>ble-2A</i> of pJB5.<br>Zeocin selection for T18 | This study |

|           |                                                                                                                                                                       |            |
|-----------|-----------------------------------------------------------------------------------------------------------------------------------------------------------------------|------------|
| pChlamy_3 | AmpR. Source of <i>aph7</i> for hygromycin selection in T18                                                                                                           | Invitrogen |
| pJB47     | KanR. T18 codon optimized <i>E. coli W3110</i> <i>xylB</i> under control of $\alpha$ -tubulin promoter and terminator. <i>aph7-2A</i> for hygromycin selection in T18 | This study |

---

**Additional file 1: Table S2: Primers used for cloning**

| Primer | Sequence <sup>a</sup>                                        | Restriction site |
|--------|--------------------------------------------------------------|------------------|
| AMJP1  | ATA <u>TCT AGA</u> <b>ATG</b> GAG TTC TTC CCC GAG            | XbaI             |
| AMJP2  | TCC <u>CCC GGG</u> <b>TTA</b> GGA AAT GTA GTG GTT GAG        | SmaI             |
| AMJP11 | ATA <u>TCT AGA</u> <b>ATG</b> CAA GCC TAT TTT GAC CAG        | XbaI             |
| AMJP12 | CGC <u>GGA TCC</u> <b>TTA</b> TTT GTC GAA CAG ATA ATG GT     | BamHI            |
| AMJP15 | CAC <u>ACA TGT</u> CGA TGG AGT TCT TCC CCG AG                | AflIII           |
| AMJP16 | GA <u>AGA TCT</u> <b>TTA</b> GGA AAT GTA GTG GTT GAG         | BglII            |
| AMJP20 | AAT <u>ACC ATG</u> <u>GGC</u> AT GCA AGC CTA TTT TGA CCA G   | NcoI             |
| AMJP39 | GAT <u>ATG CAT</u> <b>AAT</b> <b>GCA</b> CCA CCA CCA CCA CCA | NsiI             |
| AMJP40 | CAT <u>GCG GCC GCT</u> <b>TAG</b> GAA ATG TAG TGG TTG AG     | NotI             |
| JB028  | ATT ATT <u>TCT AGA</u> <b>ATG</b> ACA CAA GAA TCC CTG TTA C  | XbaI             |
| JB029  | ATT ATT <u>GGT ACC</u> <b>GGC</b> GCC GGG GGC GGT G          | KpnI             |

<sup>a</sup>. The restriction sites are underlined and the start or stop codons are in bold.

**Additional file 1: Table S3: Primers used for qPCR**

| Gene         | Primer name   | Sequence                   |
|--------------|---------------|----------------------------|
| <i>actin</i> | actin2fwd     | CGT CCT GCG CAT TGA TCT TG |
|              | actin2rvs     | GGC GAG CTT CTC CTT GAT GT |
| <i>GAPDH</i> | GAPDH2fwd     | GGC GTC AAC CAC AAG GAG TA |
|              | GAPDH2rvs     | TGT CGT TGA TGA CCT TGG CA |
| <i>xi</i>    | isoqrtpcrfwd1 | TGA GAT TGG GGA AAC CTC GC |
|              | isoqrtpcrrvs1 | TCT TGA CTG GTT CCG TGT CG |
| <i>ble</i>   | ble2HR-F      | GAC GAC GTG ACC CTG TTC AT |
|              | ble2HR-R      | TCC CGG AAG TTC GTG GAC A  |
| <i>aph7</i>  | HRo37         | CAG CGT GCT TGC AGA TTT GA |
|              | HRo38         | TGC TTG AGA CAG CGA CAG AG |

## **Additional Reference**

1. Newton DT, Mangroo D. Mapping the active site of the Haemophilus influenzae methionyl-tRNA formyltransferase: residues important for catalysis and tRNA binding. *Biochem. J.* 1999;339:63–9.
